## Outcomes and predictors of clinical response after upgrade to resynchronization therapy

Brandao M.; Goncalves Almeida J.; Fonseca P.; Rosas F.; Santos E.; Ribeiro J.; Oliveira M.; Goncalves H.; Fontes-Carvalho R.; Primo J.  
Hospital Center of Vila Nova de Gaia/Espinho, Vila Nova de Gaia, Portugal

**Funding Acknowledgements:** Type of funding sources: None.

**BACKGROUND:** Upgrade to resynchronization therapy (CRT) is common practice in Europe. However, patient selection remains a challenge. Data regarding predictors of response to upgrade is currently lacking.

**AIM:** To identify predictors of clinical response after upgrade to CRT.

**METHODS:** Single-center retrospective study of consecutive patients submitted to upgrade to CRT (2007-2018). Patients underwent clinical and echocardiographic (echo) evaluation at baseline, 6-months and 1-year. Major adverse cardiac events (MACE) included hospitalization for heart failure (HF) or all-cause mortality. Clinical response was defined as New York Heart Association (NYHA) class improvement without MACE in the 1st year of follow-up (FU). Left ventricle end-systolic volume reduction of >15% designated echo response. Multivariate logistic regression was performed to identify predictors of clinical response to CRT.

**RESULTS:** Fifty-six patients submitted to upgrade to CRT (80.4% male, mean age  $70.0 \pm 9.6$  years) were included; 43 patients (78.2%) previously had a pacemaker and 12 (21.8%) had a defibrillator device. Most patients had non-ischemic HF (67.9%), with a mean baseline left ventricle (LV) ejection fraction of  $27.9 \pm 6.4\%$ . Indications for upgrade were mainly pacemaker dependency or pacing-induced LV dysfunction (76.6%) and de novo left bundle branch block (23.4%).

Thirty-one (59.3%) patients were clinical responders. MACE occurred in 37.5% of patients; 28.6% were hospitalized for HF and 13% died during the 1st year of FU. Clinical responders had a lower rate of atrial fibrillation (AF) (46.9% vs. 53.1%,  $p=.025$ ) and a higher rate of pacemaker rhythm prior to upgrade (80.6% vs 47.6%,  $p=.013$ ). Among responders, the previous device was more frequently a pacemaker (87.5% vs 61.9%,  $p=.029$ ), and the new device a CRT-P (81.2% vs 54.5%,  $p=.035$ ). HF etiology did not differ between responders and non-responders.

Multivariate analysis identified absence of AF (odds ratio [OR] 4.4, 95% confidence interval [CI] 1.1-17.6,  $p=.037$ ), CRT-P (OR 5.7, 95% CI 1.3-25.8,  $p=.022$ ) and quadripolar lead implant (OR 3.8, 95% CI 1.3-25.8,  $p=.024$ ) as predictors of clinical response in upgraded patients.

**CONCLUSIONS:** In this cohort, absence of AF, implantation of CRT-P and use of a quadripolar lead predicted clinical response to upgrade to CRT. Larger studies are warranted to tailor selection of patients for upgrade procedures.
